# Supplementary material for: Is there any bona fide example of O–H⋯F–C bond in solution? The cases of HOC(CF3)2(4-X-2,6-C6H2(CF3)2) (X = Si(i-Pr)3, CF3)
Source: Royal Society of Chemistry journal article supplement (doi:10.1039/b710304b), 2007-01-01
Supplement: b710304b.pdf [file b710304b.pdf]

## Is there any Bona Fide Example of O–H...F–C Bond in Solution? The Cases of HOC(CF<sub>3</sub>)<sub>2</sub>(4-X-2,6-C<sub>6</sub>H<sub>2</sub>(CF<sub>3</sub>)<sub>2</sub>) (X = Si(*i*-Pr)<sub>3</sub>, CF<sub>3</sub>)

Camino Bartolomé, Pablo Espinet\* and Jose M. Martín-Alvarez

The calculations were carried out with the Gaussian 03 (Revision B.01) suite of programs: M. J. Frisch, G. W. Trucks, H. B. Schlegel, G. E. Scuseria, M. A. Robb, J. R. Cheeseman, J. A. Montgomery, Jr., T. Vreven, K. N. Kudin, J. C. Burant, J. M. Millam, S. S. Iyengar, J. Tomasi, V. Barone, B. Mennucci, M. Cossi, G. Scalmani, N. Rega, G. A. Petersson, H. Nakatsuji, M. Hada, M. Ehara, K. Toyota, R. Fukuda, J. Hasegawa, M. Ishida, T. Nakajima, Y. Honda, O. Kitao, H. Nakai, M. Klene, X. Li, J. E. Knox, H. P. Hratchian, J. B. Cross, C. Adamo, J. Jaramillo, R. Gomperts, R. E. Stratmann, O. Yazyev, A. J. Austin, R. Cammi, C. Pomelli, J. W. Ochterski, P. Y. Ayala, K. Morokuma, G. A. Voth, P. Salvador, J. J. Dannenberg, V. G. Zakrzewski, S. Dapprich, A. D. Daniels, M. C. Strain, O. Farkas, D. K. Malick, A. D. Rabuck, K. Raghavachari, J. B. Foresman, J. V. Ortiz, Q. Cui, A. G. Baboul, S. Clifford, J. Cioslowski, B. B. Stefanov, G. Liu, A. Liashenko, P. Piskorz, I. Komaromi, R. L. Martin, D. J. Fox, T. Keith, M. A. Al-Laham, C. Y. Peng, A. Nanayakkara, M. Challacombe, P. M. W. Gill, B. Johnson, W. Chen, M. W. Wong, C. Gonzalez, and J. A. Pople, Gaussian 03, Revision C.02, Gaussian, Inc., Wallingford CT, 2004.

A 6-31G(d,p) basis set was used in all calculations.<sup>1</sup> Full optimizations without symmetry constraints have been carried out at the MP2 level for the model compound *cis*-CH<sub>2</sub>OH-CH=CH-CF<sub>3</sub> (**2**).<sup>2,3</sup> The same minima and transition states were reached for that simplified model when a DFT method (B3LYP) was employed. Therefore the calculations were performed at the B3LYP level for the more complex model compounds **3** and **4**.<sup>4,5</sup> To assure that a small basis set is not the cause of the hydrogen bond missing in model compound **4**, the calculations were also performed in that case with 6-31+G†<sup>6</sup> and 6-311++G(d,p) basis set. In both cases the hydrogen bond couldn't be found as discussed in the main text.

---

<sup>1</sup> P. C. Hariharan, J. A. Pople, *Theor. Chim. Acta*, 1973, **28**, 213.

<sup>2</sup> M. J. Frisch, M. Head-Gordon, J. A. Pople, *Chem. Phys. Lett.*, 1990, **166**, 281.

<sup>3</sup> M. Head-Gordon, T. Head-Gordon, *Chem. Phys. Lett.*, 1994, **220**, 122.

<sup>4</sup> A. D. Becke, *J. Chem. Phys.*, 1993, **98**, 5648.

<sup>5</sup> C. Lee, W. Yang, R. G. Parr, *Phys. Rev. B*, 1988, **37**, 785.

<sup>6</sup> G. A. Petersson, A. Bennett, T. G. Tensfeldt, M. A. Al-Laham, W. A. Shirley, J. Mantzaris, *J. Chem. Phys.*, 1988, **89**, 2193.

**Geometries of the minima and transition states.**

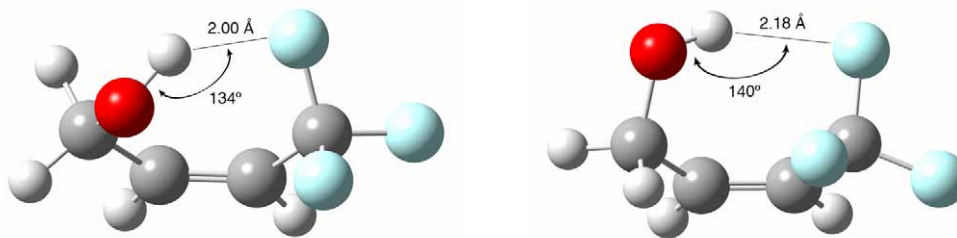

Geometries for model compound *cis*-CH<sub>2</sub>OH-CH=CH-CF<sub>3</sub> (**2**), *left*: local minimum, *right*: transition state connecting the two symmetrical minima

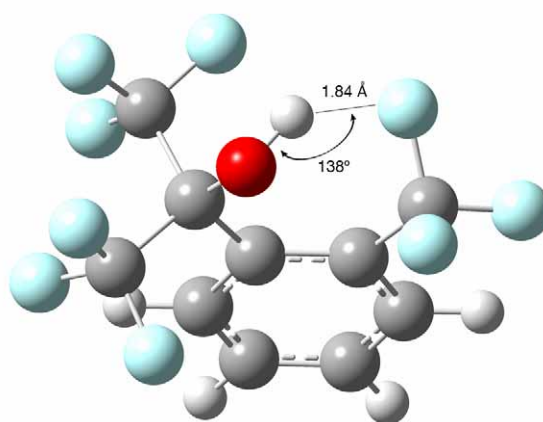

Local minimum for compound HOC(CF<sub>3</sub>)<sub>2</sub>(2-C<sub>6</sub>H<sub>4</sub>(CF<sub>3</sub>)) (**3**)

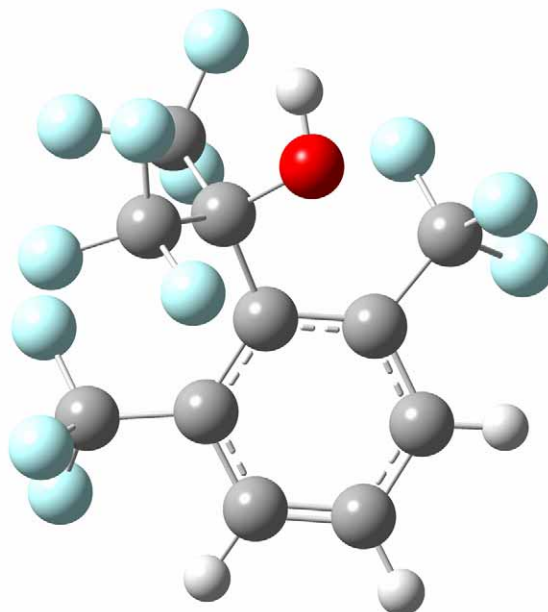

Minimum found for compound HOC(CF<sub>3</sub>)<sub>2</sub>(2,6-C<sub>6</sub>H<sub>3</sub>(CF<sub>3</sub>)<sub>2</sub>) (**4**)

Table S1. Cartesian coordinates of the MP2/6-31G(d,p) optimized structure of the model compound *cis*-CH<sub>2</sub>OH-CH=CH-CF<sub>3</sub> (**2**).

| Center Number | Atomic Number | X         | Y         | Z         |
|---------------|---------------|-----------|-----------|-----------|
| 1             | 6             | 1.199706  | 1.270870  | 0.053663  |
| 2             | 6             | -0.139126 | 1.225969  | 0.113190  |
| 3             | 6             | 2.210029  | 0.166583  | -0.107065 |
| 4             | 6             | -1.005816 | 0.012615  | 0.013298  |
| 5             | 8             | 1.770130  | -1.144727 | 0.177736  |
| 6             | 9             | -2.292251 | 0.386213  | -0.184333 |
| 7             | 9             | -0.672380 | -0.780965 | -1.054689 |
| 8             | 9             | -0.980987 | -0.772752 | 1.107351  |
| 9             | 1             | 1.645899  | 2.259850  | 0.110832  |
| 10            | 1             | -0.696937 | 2.143351  | 0.241653  |
| 11            | 1             | 2.643748  | 0.247837  | -1.113434 |
| 12            | 1             | 3.023948  | 0.363551  | 0.592831  |
| 13            | 1             | 1.144112  | -1.405455 | -0.507245 |

Table S2. Cartesian coordinates of the MP2/6-31G(d,p) transition state connecting the two symmetrical minima for the model compound *cis*-CH<sub>2</sub>OH-CH=CH-CF<sub>3</sub> (**2**).

| Center Number | Atomic Number | X         | Y         | Z         |
|---------------|---------------|-----------|-----------|-----------|
| 1             | 6             | 1.161659  | 1.261620  | -0.178724 |
| 2             | 6             | -0.170173 | 1.186790  | -0.329874 |
| 3             | 6             | 2.070929  | 0.185175  | 0.362797  |
| 4             | 6             | -1.003147 | -0.002815 | 0.021926  |
| 5             | 8             | 1.924294  | -1.087934 | -0.262644 |
| 6             | 9             | -2.297512 | 0.354274  | 0.174857  |
| 7             | 9             | -0.968499 | -0.947132 | -0.965901 |
| 8             | 9             | -0.608143 | -0.609645 | 1.160058  |
| 9             | 1             | 1.631754  | 2.191344  | -0.478753 |
| 10            | 1             | -0.724132 | 2.008917  | -0.761963 |
| 11            | 1             | 3.105126  | 0.510580  | 0.234910  |
| 12            | 1             | 1.893991  | 0.071606  | 1.436079  |
| 13            | 1             | 1.210684  | -1.041069 | -0.906991 |

Table S3. Cartesian coordinates of the B3LYP/6-31G(d,p) optimized structure of the model compound  $\text{HOC}(\text{CF}_3)_2(2\text{-C}_6\text{H}_4(\text{CF}_3))$  (**3**).

| Center Number | Atomic Number | X         | Y         | Z         |
|---------------|---------------|-----------|-----------|-----------|
| 1             | 6             | -1.883504 | -0.518321 | 0.148881  |
| 2             | 6             | -0.711639 | 0.252392  | 0.083361  |
| 3             | 6             | 0.521439  | -0.442736 | -0.012374 |
| 4             | 6             | 0.526366  | -1.844851 | -0.011389 |
| 5             | 6             | -0.649587 | -2.582300 | 0.071287  |
| 6             | 6             | -1.863119 | -1.910309 | 0.148264  |
| 7             | 6             | -0.883355 | 1.795090  | 0.091548  |
| 8             | 6             | 1.895102  | 0.198218  | -0.108223 |
| 9             | 8             | 0.281054  | 2.536339  | 0.310735  |
| 10            | 6             | -1.484260 | 2.269033  | -1.268233 |
| 11            | 6             | -1.803745 | 2.251261  | 1.271663  |
| 12            | 9             | 2.855639  | -0.709663 | -0.374417 |
| 13            | 9             | 1.968637  | 1.105823  | -1.136919 |
| 14            | 9             | 2.265238  | 0.834801  | 1.013297  |
| 15            | 9             | -0.552598 | 2.069988  | -2.229460 |
| 16            | 9             | -2.594956 | 1.607610  | -1.632798 |
| 17            | 9             | -1.772967 | 3.577525  | -1.243768 |
| 18            | 9             | -1.457924 | 1.620165  | 2.404328  |
| 19            | 9             | -3.108959 | 1.983008  | 1.027671  |
| 20            | 9             | -1.706200 | 3.565850  | 1.479195  |
| 21            | 1             | -2.840119 | -0.020535 | 0.210261  |
| 22            | 1             | 1.474092  | -2.361908 | -0.082123 |
| 23            | 1             | -0.610070 | -3.666891 | 0.070510  |
| 24            | 1             | -2.798476 | -2.458102 | 0.207949  |
| 25            | 1             | 0.877593  | 2.418853  | -0.441856 |

Table S4. Cartesian coordinates of the B3LYP/6-31G(d,p) optimized structure of the model compound  $\text{HOC}(\text{CF}_3)_2(2,6\text{-C}_6\text{H}_3(\text{CF}_3)_2)$  (**4**).

| Center Number | Atomic Number | X         | Y         | Z         |
|---------------|---------------|-----------|-----------|-----------|
| 1             | 6             | 0.000000  | 0.000000  | 0.000000  |
| 2             | 6             | 0.000000  | 0.000000  | 1.381435  |
| 3             | 6             | 1.195334  | 0.000000  | 2.116911  |
| 4             | 6             | 2.453049  | -0.070927 | 1.458725  |
| 5             | 6             | 2.428922  | 0.088191  | 0.039817  |
| 6             | 6             | 1.216300  | 0.094632  | -0.658428 |
| 7             | 6             | 0.878661  | 0.116474  | 3.609803  |
| 8             | 9             | 0.287882  | -1.008318 | 4.065745  |
| 9             | 6             | 3.794005  | -0.370828 | 2.199870  |
| 10            | 6             | 4.284334  | 0.830120  | 3.111124  |
| 11            | 9             | 3.448289  | 1.878015  | 3.044252  |
| 12            | 6             | 3.632473  | 0.329331  | -0.872163 |
| 13            | 9             | 4.510845  | 1.267906  | -0.331538 |
| 14            | 9             | -0.021527 | 1.117266  | 3.783558  |
| 15            | 9             | 1.905497  | 0.401124  | 4.419132  |
| 16            | 6             | 3.732222  | -1.746561 | 2.953351  |
| 17            | 9             | 2.785480  | -1.843042 | 3.895555  |
| 18            | 8             | 4.857512  | -0.686774 | 1.287999  |
| 19            | 9             | 4.911283  | -2.003581 | 3.533143  |
| 20            | 9             | 3.484340  | -2.703766 | 2.043871  |
| 21            | 9             | 4.326909  | -0.758057 | -1.212503 |
| 22            | 9             | 3.232336  | 0.893998  | -2.034264 |
| 23            | 9             | 4.448437  | 0.484317  | 4.391870  |
| 24            | 9             | 5.483323  | 1.280358  | 2.668742  |
| 25            | 1             | 1.233514  | 0.191553  | -1.735201 |
| 26            | 1             | -0.930666 | -0.020832 | -0.556654 |
| 27            | 1             | -0.940000 | 0.018402  | 1.919934  |
| 28            | 1             | 5.313596  | 0.141600  | 1.084722  |
